# Supplementary material for: Early Embryogenesis of Brown Alga Fucus vesiculosus L. is Characterized by Significant Changes in Carbon and Energy Metabolism
Source: PubMed Central journal article supplement (PMC6151410; doi:10.3390/molecules22091509), 2017-09-09
Supplement: molecules-22-01509-s001.pdf [file molecules-22-01509-s001.pdf]

**Table S1. Retention times (RT), calculated retention indexes (RI) and content of compounds detected in *F. vesiculosus* eggs, zygotes and embryos.** All values of metabolite content represent the means of 4 replicates  $\pm$  standard deviation. DW = “dry weight”

| Primary metabolites |                           |          |      |                               |                                                    |
|---------------------|---------------------------|----------|------|-------------------------------|----------------------------------------------------|
| No.                 | Analyte                   | RT (min) | RI   | Quantification, $m/z \pm 0.5$ | $\mu\text{mol/g DW}$ in <i>F. vesiculosus</i> eggs |
| 1                   | Alanine                   | 10.61    | 1106 | 116                           | 38 $\pm$ 10                                        |
| 2                   | 2-Aminobutyric acid       | 12.18    | 1172 | 130                           | -                                                  |
| 3                   | Valine                    | 13.15    | 1214 | 218                           | 2.9 $\pm$ 1.1                                      |
| 4                   | Glycerol                  | 14.41    | 1268 | 218                           | 0.66 $\pm$ 0.07                                    |
| 5                   | Phosphoric acid           | 14.45    | 1272 | 314                           | -                                                  |
| 6                   | Isoleucine                | 14.88    | 1288 | 158                           | 0.8 $\pm$ 0.5                                      |
| 7                   | Proline                   | 15.01    | 1295 | 142                           | 0.6 $\pm$ 0.5                                      |
| 8                   | Glycine                   | 15.16    | 1303 | 248                           | 0.9 $\pm$ 0.2                                      |
| 9                   | Succinic acid             | 15.41    | 1312 | 247                           | 0.17 $\pm$ 0.04                                    |
| 10                  | Glyceric acid             | 15.67    | 1324 | 292                           | -                                                  |
| 11                  | Fumaric acid              | 16.19    | 1348 | 245                           | 0.05 $\pm$ 0.02                                    |
| 12                  | Serine                    | 16.32    | 1354 | 218                           | 5.8 $\pm$ 4.0                                      |
| 13                  | Threonic acid-1,4-lactone | 16.74    | 1373 | 101                           | -                                                  |
| 14                  | Threonine                 | 16.87    | 1379 | 218                           | 0.6 $\pm$ 0.3                                      |
| 15                  | $\beta$ -alanine          | 17.78    | 1422 | 290                           | -                                                  |
| 16                  | Malic acid                | 19.06    | 1483 | 233                           | 0.50 $\pm$ 0.10                                    |
| 17                  | Threitol                  | 19.38    | 1498 | 217                           | -                                                  |
| 18                  | Aspartic acid             | 19.69    | 1514 | 233                           | 3.9 $\pm$ 2.1                                      |
| 19                  | Pyroglutamic acid         | 19.89    | 1524 | 258                           | -                                                  |
| 20                  | Threonic acid             | 20.44    | 1554 | 220                           | -                                                  |
| 21                  | Methyldodecanoate         | 21.57    | 1612 | 83                            | -                                                  |
| 22                  | Glutamic acid             | 21.62    | 1618 | 348                           | 12.5 $\pm$ 4.6                                     |

|    |                      |       |      |     |             |
|----|----------------------|-------|------|-----|-------------|
| 23 | Phenylalanine        | 21.80 | 1626 | 192 | 3.3±1.0     |
| 24 | Xylose               | 22.26 | 1649 | 217 |             |
| 25 | Arabinose            | 22.39 | 1655 | 217 | 0.030±0.004 |
| 26 | Unknown pentitol     | 22.95 | 1685 | 319 | -           |
| 27 | Unknown pentitol     | 23.13 | 1694 | 307 | -           |
| 28 | Isocitric lactone    | 23.51 | 1716 | 303 | -           |
| 29 | cis-Aconitic acid    | 24.06 | 1746 | 229 | 0.14±0.06   |
| 30 | Glycerol-3-phosphate | 24.24 | 1757 | 358 | -           |
| 31 | Citric acid          | 25.24 | 1814 | 211 | 3.5±0.4     |
| 32 | Myristic acid        | 25.81 | 1847 | 300 | -           |
| 33 | Fructose             | 26.05 | 1862 | 307 | 0.37±0.14   |
| 34 | Galactose            | 26.27 | 1875 | 319 | 0.02±0.01   |
| 35 | Mannose              | 26.40 | 1882 | 319 | 0.8±0.3     |
| 36 | Glucose              | 26.48 | 1887 | 364 | 23±7        |
| 37 | Mannitol             | 26.95 | 1916 | 421 | 70± 8       |
| 38 | Unknown sugar        | 27.64 | 1958 | 333 | -           |
| 39 | Unknown hexose       | 27.88 | 1972 | 129 | -           |
| 40 | Gluconic acid        | 28.07 | 1985 | 333 | -           |
| 41 | Palmitic acid        | 29.01 | 2046 | 328 | -           |
| 42 | myo-Inositol         | 29.49 | 2078 | 432 | 1.3±0.7     |
| 43 | Methyloctadecenoate  | 29.94 | 2108 | 264 | -           |
| 44 | 1-Octadecanol        | 30.61 | 2153 | 111 | -           |
| 45 | Linoleic acid        | 31.47 | 2211 | 352 | -           |
| 46 | Oleic acid           | 31.55 | 2217 | 354 | -           |
| 47 | Fructose-6-phosphate | 32.62 | 2294 | 315 | -           |
| 48 | Glucose-6-phosphate  | 32.79 | 2306 | 387 | -           |
| 49 | 1-Eicosanol          | 33.36 | 2349 | 355 | -           |

|    |                          |       |      |     |             |
|----|--------------------------|-------|------|-----|-------------|
| 50 | Arachidonic acid         | 33.65 | 2368 | 361 | -           |
| 51 | Myo-Inositol-1-phosphate | 34.02 | 2394 | 387 | -           |
| 52 | Eicosanoic acid          | 34.56 | 2436 | 435 | -           |
| 53 | Unknown disaccharide     | 36.17 | 2564 | 361 | -           |
| 54 | 1-Monopalmitoylglycerol  | 36.37 | 2579 | 459 | -           |
| 55 | Sucrose                  | 36.74 | 2612 | 437 | <0.01       |
| 56 | Docosanoic acid          | 37.04 | 2634 | 397 | -           |
| 57 | Unknown disaccharide     | 37.44 | 2669 | 361 | -           |
| 58 | Maltose                  | 37.98 | 2717 | 361 | 0.120±0.003 |
| 59 | Unknown polyol           | 38.47 | 2758 | 451 | -           |
| 60 | Unknown disaccharide     | 38.84 | 2789 | 453 | -           |
| 61 | Unknown disaccharide     | 39.25 | 2824 | 481 | -           |
| 62 | Maltitol                 | 39.44 | 2841 | 525 | -           |
| 63 | Unknown disaccharide     | 39.57 | 2851 | 571 | -           |
| 64 | Unknown sugar            | 39.73 | 2865 | 409 | -           |
| 65 | Unknown trisaccharide    | 46.19 | 3415 | 361 | -           |
| 66 | Unknown trisaccharide    | 46.57 | 3447 | 361 | -           |
| 67 | Unknown polyol           | 46.69 | 3458 | 361 | -           |
| 68 | Unknown polyol           | 46.79 | 3466 | 361 | -           |
| 69 | Unknown polyol           | 46.99 | 3483 | 361 | -           |
| 70 | Unknown polyol           | 47.34 | 3514 | 525 | -           |
| 71 | Unknown sugar            | 47.50 | 3527 | 345 | -           |

**Secondary metabolites**

| Nr | Analyte        | Ref*  | RT    | RI   | Quantification,<br><i>m/z</i> ± 0.5 | µmol/g DW in<br><i>F. vesiculosus</i> eggs |
|----|----------------|-------|-------|------|-------------------------------------|--------------------------------------------|
| 1  | Benzoic acid   | [1,2] | 14.04 | 1252 | 179                                 | -                                          |
| 2  | Pipecolic acid | -     | 16.48 | 1361 | 156                                 | -                                          |
| 3  | 2,2-Biphenol   | -     | 20.72 | 1567 | 330                                 | -                                          |

|    |                                              |           |       |      |     |           |
|----|----------------------------------------------|-----------|-------|------|-----|-----------|
| 4  | Pyrogallol                                   | -         | 21.29 | 1598 | 342 | -         |
| 5  | p-Hydroxybenzoic acid                        | [3,4]     | 21.90 | 1629 | 267 | -         |
| 6  | Phloroglucinol                               | [5,6]     | 22.12 | 1641 | 342 | 0.11±0.01 |
| 7  | Tetrahydroxybenzol                           | [7]       | 24.17 | 1752 | 430 | -         |
| 8  | Homogentisic acid                            | [7]       | 25.56 | 1832 | 341 | -         |
| 9  | Phytol                                       | [2]       | 25.65 | 1838 | 123 | -         |
| 10 | Dehydroascorbic acid dimer                   | [8,9]     | 25.77 | 1845 | 406 | -         |
| 11 | Ascorbic acid                                | [8,9]     | 27.51 | 1950 | 299 | -         |
| 12 | Pentadecanoic acid                           | [2,10,11] | 27.56 | 1953 | 332 | -         |
| 13 | Difucol                                      | [12]      | 32.44 | 2281 | 682 | -         |
| 14 | Diphlorethol                                 | [13]      | 33.83 | 2380 | 610 | -         |
| 15 | Phloroglucinat/<br>phloroglucinol derivative | -         | 34.83 | 2459 | 443 | -         |
| 16 | Tetracosenoic acid                           | -         | 39.00 | 2803 | 423 | -         |
| 17 | Squalene                                     | [10,14]   | 39.23 | 2822 | 137 | -         |
| 18 | Tocopherol $\delta$                          | [8,15]    | 40.11 | 2897 | 209 | -         |
| 19 | Phloroglucinol derivative                    | -         | 40.89 | 2963 | 476 | -         |
| 20 | Tocopherol $\beta$                           | [8,15]    | 41.05 | 2977 | 489 | -         |
| 21 | Tocopherol $\gamma$                          | [8,15]    | 41.17 | 2988 | 489 | -         |
| 22 | Tocopherol $\alpha$                          | [8,15]    | 42.69 | 3117 | 277 | -         |
| 23 | Unknown sterol                               | -         | 42.91 | 3136 | 459 | -         |
| 24 | Fucosterol                                   | [16]      | 44.92 | 3307 | 327 | -         |
| 25 | Putative phloroglucinol trimer <sup>#</sup>  | -         | 47.28 | 3502 | 609 | -         |
| 26 | Putative phloroglucinol trimer <sup>#</sup>  | -         | 47.57 | 3530 | 609 | -         |

\*Ref = references; references are given with respect to at least one reported occurrence in brown algae. According to this, five tentatively identified analytes have not been reported in any species of brown algae yet. #e.g. fucophlorethols<sup>[17]</sup>, or triphlorethol, trifuhalol

- [1] Z. Kamenarska, A. Ivanova, R. Stancheva, M. Stoyneva, K. Stefanov, S. Dimitrova-Konaklieva, S. Popov, *Botanica Marina* **2006**, *49*, 343.
- [2] Z. Kamenarska, S. Dimitrova-Konaklieva, K. Stefanov, H. Najdenski, I. Tzvetkova, S. Popov, *Botanica Marina* **2002**, *45*, 623.

- [3] E. P. Moraes, F. J. Rupérez, M. Plaza, M. Herrero, C. Barbas, *Electrophoresis* **2011**, *32*, 2055.
- [4] L. Onofrejová, J. Vasícková, B. Klejdus, P. Stratil, L. Misurcová, S. Krácmar, J. Kopecký, J. Vacek, *Journal of pharmaceutical and biomedical analysis* **2010**, *51*, 464.
- [5] T. Nakamura, K. Nagayama, K. Uchida, R. Tanaka, *Fisheries Science* **1996**, *62*, 923.
- [6] K.-W. Glombitza, H. U. Rosener, H. Vilter, W. Rauwald, *Planta Medica* **1973**, *24*, 301.
- [7] K.-W. Glombitza, Shu-Ming Li, *Phytochemistry* , *30*, 2741-2745,
- [7] E. Rickert, M. Wahl, H. Link, H. Richter, G. Pohnert, *PloS one* **2016**, *11*, e0168196.
- [8] S. Lordan, R. P. Ross, C. Stanton, *Marine drugs* **2011**, *9*, 1056.
- [9] I. M. Munda, *Hydrobiologia* **1987**, *151-152*, 477.
- [10] M. E. Hattab, H. S. S. A. Easa, A. Tabaries, L. Piovetti, J.-M. Kornprobst, *Journal of Essential Oil Research* **2007**, *19*, 37.
- [11] S. V. Khotimchenko, *Phytochemistry* **1995**, *38*, 1411.
- [12] K.-W. Glombitza, H.-W. Rauwald, G. Eckhard, *Phytochemistry*. 1975, *14*, pp. 1403-1405.
- [13] K.-W. Glombitza, H. U. Rosener, D. Müller, *Phytochemistry*. 1975, *14*, pp. 1114-1116.
- [14] P. Deepak, R. Sowmiya, G. Balasubramani, P. Perumal, *Journal of Taibah University Medical Sciences* **2017**, *12*, 329.
- [15] T. Nakamura, K. Nagayama, S. Kawaguchi, *Fisheries Science* **1994**, *60*, 793.
- [16] L. J. Goad, T. W. Goodwin, *European Journal of Biochemistry*, **1969**, *7*, 502.
- [17] J. S. Craigie, A. G. McInnes, M. A. Ragan, J. A. Walter, *Canadian Journal of Chemistry*, **1977**, *55*, 1575.
